# Supplementary material
Source: Springer Nature journal article supplement (https://www.springermedizin.de/resource/supplementary/12943_2007_363_MOESM4_ESM.pdf/9554018)

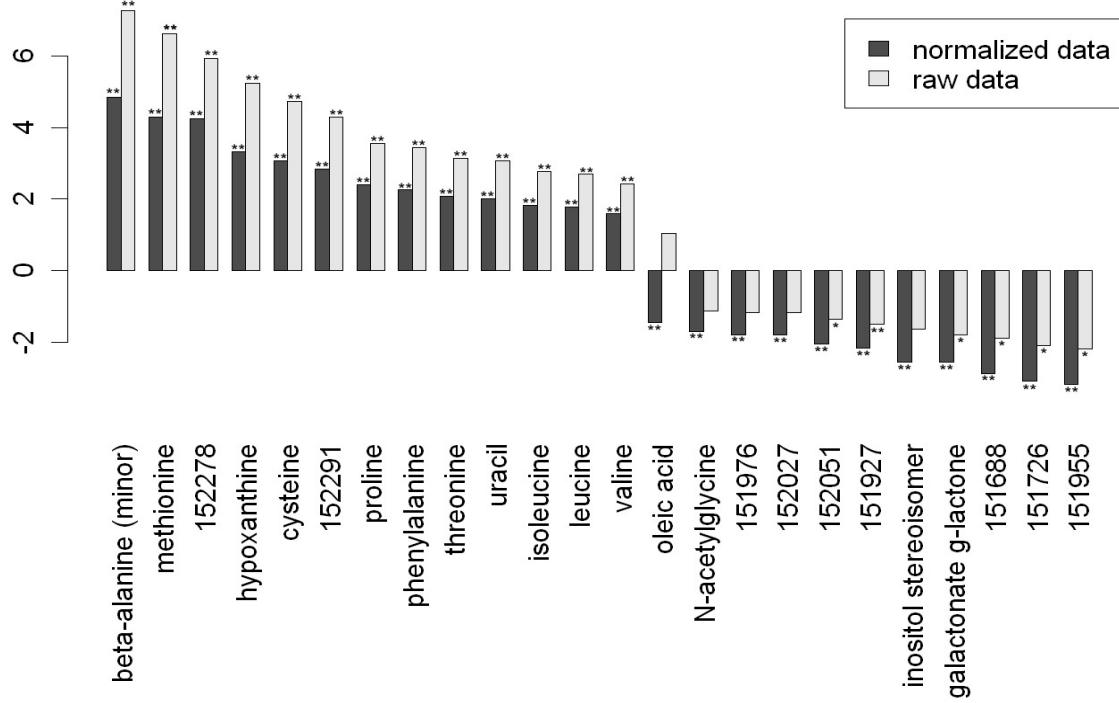

Supplement: MOESM4 [file 9554018]
